# Supplementary material
Source: MDPI journal article supplement (https://www.mdpi.com/2673-8007/3/4/85)
Supplement: s1 [file s1]

**Supplementary Materials**

**Title: Unraveling Microbial Endosymbiosis Dynamics in Plant-Parasitic Nematodes with a  
Genome Skimming Strategy**

**Supplementary Table S1.** Metagenomic assembly statistics for 52 nematode populations consist of twelve plant parasitic nematode species. All statistics are based on contigs of size  $\geq 500$  bp.

| <b>Nematode species</b> | <b>Population</b> | <b>Number of contigs</b> | <b>Assembly size (total length) (Mb)</b> | <b>N50 (bp)</b> | <b>GC %</b> |
|-------------------------|-------------------|--------------------------|------------------------------------------|-----------------|-------------|
| <i>B. cocophilus</i>    | Bc_Cr             | 33724                    | 121.9                                    | 6545            | 42.4        |
| <i>G. pallida</i>       | Gp_Bin25_0        | 192940                   | 241.6                                    | 1410            | 56.33       |
|                         | Gp_Bin26_0        | 319350                   | 407.7                                    | 1493            | 63.22       |
|                         | Gp_Bin32_0        | 289064                   | 313.1                                    | 1126            | 54.58       |
|                         | Gp_Bin54_0        | 101360                   | 150.3                                    | 2046            | 44.58       |
|                         | Gp_Bin64_0        | 133979                   | 190.8                                    | 1885            | 49.82       |
|                         | Gp_Bin258_0       | 135871                   | 186.0                                    | 1712            | 48.35       |
|                         | Gp_GH             | 132155                   | 197.3                                    | 1977            | 45.54       |
| <i>H. glycines</i>      | Hg_Al             | 48172                    | 100.7                                    | 3676            | 38.99       |
|                         | Hg_Aud            | 73535                    | 167.5                                    | 3860            | 48.66       |
|                         | Hg_Pet            | 73828                    | 134.5                                    | 2492            | 49.11       |
|                         | Hg_War            | 54187                    | 125.4                                    | 4022            | 45.43       |
| <i>M. incognita</i>     | Mi_Al             | 66004                    | 129.1                                    | 2636            | 32          |
|                         | Mi_Ca             | 111282                   | 173.7                                    | 1989            | 41.23       |
|                         | Mi_Har            | 62587                    | 118.6                                    | 2606            | 29.35       |
|                         | Mi_Mo             | 100394                   | 155.1                                    | 2107            | 29.23       |
| <i>N. aberrans</i>      | Psp_Ch6           | 176502                   | 255.1                                    | 2085            | 38.31       |
| <i>P. coffeae</i>       | Pc_Cr             | 64553                    | 136.8                                    | 3766            | 36.11       |
|                         | Pc_DC2            | 46131                    | 137.1                                    | 6003            | 35.55       |
|                         | Pc_Y2             | 54715                    | 113.8                                    | 3311            | 34.7        |
| <i>P. neglectus</i>     | Pn_Bec            | 103020                   | 146.8                                    | 1767            | 48.15       |
|                         | Pn_Cem            | 88970                    | 186.2                                    | 4882            | 52.16       |
|                         | Pn_Hen            | 74679                    | 127.1                                    | 2839            | 53.63       |
|                         | Pn_Jep            | 95029                    | 150.9                                    | 2116            | 49.04       |
|                         | Pn_Lon            | 80973                    | 118.1                                    | 1922            | 51.79       |
|                         | Pn_Smi            | 102159                   | 150.3                                    | 1877            | 52.8        |
|                         | Pn_Tur            | 115456                   | 142.1                                    | 1367            | 48.85       |

|                      |         |        |       |       |       |
|----------------------|---------|--------|-------|-------|-------|
|                      | Psp_Ch3 | 148213 | 129.8 | 873   | 41.99 |
|                      | Psp_Ch4 | 57411  | 59.4  | 1050  | 53.76 |
| <i>P. penetrans</i>  | Pp_Cr   | 191262 | 206.3 | 1155  | 37.79 |
|                      | Pp_Fhp  | 133029 | 156.6 | 1227  | 44.39 |
|                      | Pp_GH2  | 154349 | 152.6 | 1023  | 37.95 |
|                      | Psp_Ch2 | 37342  | 46.9  | 1500  | 49.22 |
|                      | Psp_Ch5 | 41821  | 34.1  | 791   | 41.9  |
|                      | Psp_Ch7 | 17836  | 13.4  | 715   | 38.37 |
|                      | Psp_Ch8 | 143524 | 255.7 | 3097  | 37.03 |
| <i>P. thornei</i>    | Psp_Ch1 | 129688 | 125.6 | 957   | 40.45 |
|                      | Psp_Tut | 128467 | 170.9 | 1515  | 46.84 |
| <i>P. vulnus</i>     | Pv_Ca   | 34903  | 84.3  | 5734  | 43.67 |
|                      | Pv_Ga   | 50015  | 119.6 | 5488  | 47.85 |
| <i>R. reniformis</i> | Rr_Al   | 133331 | 182.7 | 1666  | 36.98 |
|                      | Rr_Fl   | 115945 | 193.7 | 2266  | 36.62 |
|                      | Rr_Hal  | 77143  | 122.2 | 2147  | 50.79 |
|                      | Rr_Mi   | 109199 | 163.8 | 1866  | 45.35 |
|                      | Rr_Poa  | 88107  | 121.5 | 1550  | 45.91 |
| <i>R. similis</i>    | Rs_Fl   | 44727  | 118.2 | 16346 | 54.45 |
|                      | Rs_Rd   | 12689  | 66.4  | 19178 | 48.02 |
|                      | Rs_Rv   | 5528   | 51.7  | 24082 | 47.01 |
|                      | Rs_5    | 43101  | 199.5 | 26194 | 57.74 |
|                      | Rs_14   | 112064 | 241.1 | 5362  | 58.99 |
|                      | Rs_N1   | 92254  | 146.4 | 2013  | 51.41 |
|                      | Rs_cit  | 155355 | 260.3 | 3171  | 56.49 |

**Supplementary Table S2.** *Wolbachia* and *Cardinium* bacterial endosymbiont occurrence in 52 nematode populations.

| <b>Nematode species</b> | <b>Location</b> | <b>Population</b> | <b><i>Wolbachia</i></b> | <b><i>Cardinium</i></b> |
|-------------------------|-----------------|-------------------|-------------------------|-------------------------|
| <i>B. cocophilus</i>    | Costa Rica      | Bc_Cr             | N                       | N                       |
| <i>G. pallida</i>       | Idaho           | Gp_Bin25_0        | W                       | W                       |
|                         |                 | Gp_Bin26_0        | W                       | N                       |
|                         |                 | Gp_Bin32_0        | N                       | N                       |
|                         |                 | Gp_Bin54_0        | N                       | N                       |
|                         |                 | Gp_Bin64_0        | N                       | N                       |
|                         |                 | Gp_Bin258_0       | N                       | N                       |
|                         |                 | Gp_GH             | N                       | N                       |
| <i>H. glycines</i>      | Alabama         | Hg_Al             | N                       | S                       |
|                         | Missouri        | Hg_Aud            | N                       | W                       |
|                         |                 | Hg_Pet            | N                       | N                       |
|                         |                 | Hg_War            | N                       | W                       |
| <i>M. incognita</i>     | Alabama         | Mi_Al             | N                       | N                       |
|                         | California      | Mi_Ca             | N                       | N                       |
|                         | New York        | Mi_Har            | N                       | N                       |
|                         | Missouri        | Mi_Mo             | W                       | N                       |
| <i>N. aberrans</i>      | Chile           | Psp_Ch6           | N                       | N                       |
| <i>P. coffeae</i>       | Costa Rica      | Pc_Cr             | W                       | N                       |
|                         |                 | Pc_DC2            | N                       | N                       |
|                         |                 | Pc_Y2             | N                       | N                       |
| <i>P. neglectus</i>     | Montana         | Pn_Bec            | N                       | W                       |
|                         |                 | Pn_Hen            | N                       | N                       |
|                         |                 | Pn_Lon            | N                       | N                       |
|                         |                 | Pn_Smi            | W                       | N                       |
|                         |                 | Pn_Tur            | N                       | N                       |
|                         | Oregon          | Pn_Cem            | N                       | N                       |
|                         |                 | Pn_Jep            | N                       | N                       |
|                         | Chile           | Psp_Ch3           | N                       | N                       |
|                         |                 | Psp_Ch4           | N                       | N                       |
| <i>P. penetrans</i>     | Costa Rica      | Pp_Cr             | S                       | W                       |

|                      |             |         |   |   |
|----------------------|-------------|---------|---|---|
|                      | Oregon      | Pp_Fhp  | W | N |
|                      |             | Pp_GH*  | S | W |
|                      | Chile       | Psp_Ch2 | W | N |
|                      |             | Psp_Ch5 | N | N |
|                      |             | Psp_Ch7 | W | N |
|                      |             | Psp_Ch8 | W | N |
|                      |             |         |   |   |
| <i>P. thornei</i>    | Chile       | Psp_Ch1 | W | N |
|                      | Oregon      | Psp_Tut | N | N |
|                      |             |         |   |   |
| <i>P. vulnus</i>     | California  | Pv_Ca   | N | N |
|                      | Georgia     | Pv_Ga   | N | N |
|                      |             |         |   |   |
| <i>R. reniformis</i> | Alabama     | Rr_Al   | N | W |
|                      | Florida     | Rr_Fl   | N | W |
|                      | Mississippi | Rr_Mi   | N | W |
|                      | Hawaii      | Rr_Poa  | W | W |
|                      |             | Rr_Hal  | W | W |
|                      |             |         |   |   |
| <i>R. similis</i>    | Florida     | Rs_Fl   | N | N |
|                      | Costa Rica  | Rs_Rd   | N | N |
|                      |             | Rs_Rv   | N | N |
|                      | Uganda      | Rs_5    | S | N |
|                      | Colombia    | Rs_14   | S | N |
|                      | Nigeria     | Rs_N1   | S | N |
|                      | Florida     | Rs_cit  | W | N |

“N” indicates no detectable symbiont (no evidence), “W” indicates weak evidence, “S” indicates strong evidence. “\*” indicates positive control.
